# Supplementary material for: Simulations of 7 Be and 10 Be with the GEOS-Chem global model v14.0.2 using state-of-the-art production rates
Source: Copernicus journal article supplement (doi:10.5194/gmd-2023-111), 2023-06-26
Supplement: Supplementary file 1 [file gmd-2023-111-supplement.zip]

Archive with 2 entries (2 files):
- supplementary_May2023_Final.pdf
- TableS1_S4.xlsx
