# Supplementary material for: Simulations of 7 Be and 10 Be with the GEOS-Chem global model v14.0.2 using state-of-the-art production rates
Source: Copernicus journal article supplement (doi:10.5194/gmd-2023-111), 2023-06-26
Supplement: Supplementary file 1 [file TableS1_S4.xlsx]

## Sheet: TableS1
		Table S1. Overview of the simulations in this study. All simulations include a 4-year (2008-2011) spinup.
		Runs	Production models	Simulation periods	Description of the production models	Model resolution
		Exp1	LP67 (Default production in GEOS-Chem)	2012-2018	- Empirical parameterization of the production rates - Production only for the year 1958 and do not consider the solar modulation influences (e.g., 11-year solar cycle). - 10Be is calculated simply by scaling the 7Be production with a ratio 0.55	- Horizontal: 4°x5° - Vertical: 72 levels
		Exp2	P16spa	2012-2018	- Integral of the yield function from simulation of atmospheric cascade, and the energy spectrum of cosmic rays above the geomagnetic cutoff rigidity - The cut-off rigidity is taken from the Copeland (2018) which includes both dipole and non-dipole contributions
		Exp3	P16	2012	Same as P16spa, but the cut-off rigidity is simply calculated as a function of the geomagnetic latitude and geomagnetic dipole moment

## Sheet: TableS2
Table S2. 10Be data measured from surface air samples
Locations	Covering period	Resolution	Latitude	Longitude	10Be (104 atoms/m3)	Dust 10Be contribution (%)	References
Chengdu, China	Oct. 2020 - Sep. 2021	Daily	30.94°N	103.67°E	3.52	0.22	Liu et al., 2022
Southern Sweden	1983 - 2000	Weekly	56.08°N	13.23°E	3.092	NA	Aldahan et al., 2008
Northern, Sweden	1983 - 2000	Weekly	67.84°N	20.34°E	2.508	NA	Aldahan et al., 2008
Tokyo, Japan	2002 - 2014	Weekly	35.7°N	139.6°E	5.83	NA	Yamagata et al., 2019
Dazaifu, Japan	1998 - 2002	Weekly	33.5°N	130.5°E	4.78	NA	Yamagata et al., 2019
Seville, Spain	Dec. 2012 - Dec. 2013	Weekly	37.35°N	5.99°W	4.52832	0.1	Padilla et al., 2019
Cáceres, Spain	Nov. 2004 - Mar. 2007	Monthly	39.51°N	6.34°W	4.61	NA	Rodriguesz-Perulero et al., 2019
Lhasa, China	Aug. 2006 - Jul . 2007	(bi)Weekly	29.63°N	91.02°E	14.14	NA	Huang et al., 2010
Mexico city, Mexico	Jan.- Mar. & Dec. 2016	(bi)Weekly	19.4°N	99.1°W	3.11	0.05	Méndez-García et al., 2022
Alert, Canada	Sep.1990 - Sep. 1991	Weekly	82.5°N	62.3°W	2.2	Polar region, considering little dust influence	Dibb et al., 1994
Neumayer, Antarctica	1984-2008	Weekly to Annual	70.65°S	8.25°W	4.6		Elsasser et al., 2011

## Sheet: TableS3
Table S3. 10Be data measured from precipitation samples and ice core samples.
Location	Covering period	Resolution	Latitude	Longitude	Annual precipitation/accumulation (mm/y)	10Be annual deposition (106 atoms/cm2/yr)	Dust 10Be contribution (%)	References
Gracefield, New Zealand	Oct. 1996 - Nov. 1998	Monthly	41.25°S	174.92°E	NA	2.75	0.1	Graham et al., 2003
Leigh, New Zealand	Oct. 1997 - Sep. 1998	Monthly	36.28°S	174.80°E	NA	2.63	0.11	Graham et al., 2003
Dunedin, New Zealand	Mar. 1997 - Sep. 1998	Monthly	45.87°S	170.50°E	NA	1.85	0.08	Graham et al., 2003
Berkeley, Calif, USA	Dec. 1980 - Dec. 1981	Annually	37.87°N	122.29°W	589	1.38	0.21	Monaghan et al., 1986
Salt Lake City, Utah, USA	Dec. 1980 - Dec. 1981	Annually	40.78°N	111.98°W	439	1.63	0.29	Monaghan et al., 1986
College Station, Texas, USA	Oct. 1980 - Nov. 1981	Annually	30.59°N	96.30°W	996	2.4	0.26	Monaghan et al., 1986
Argonne, USA	Sep. 1980 - Sep. 1981	Annually	41.71°N	87.98°W	874	2.47	0.35	Monaghan et al., 1986
Miami, Fla, USA	Aug. 1980 - Aug. 1981	Annually	25.78°N	80.21°W	1518	1.77	0.26	Monaghan et al., 1986
New Haven, Conn, USA	Dec. 1980 - Jan. 1982	Annually	41.30°N	72.92°W	1169	3.12	0.2	Monaghan et al., 1986
Jungfraujoch, Switzerland	Jan. 1998 - Dec. 2004	Monthly	46.32°N	7.59°E	1277.5	2.55442	NA	Heikkila et al., 2008
Dubendorf, Switzerland	Jan. 1998 - Nov. 2004	Monthly	47.25°N	8.27°E	949	2.55442	NA	Heikkila et al., 2008
Delhi, India	Jun. 1979 - Jul. 1981	Annually	28.60°N	77.20°E	550	2.4	NA	Somayajulu et al., 1984
Agra, India	Jul. 1979 - Jul. 1981	Annually	27.20°N	78.03°E	470	1.7	NA	Somayajulu et al., 1984
Ahmedabad, India	Jun. 1979 - Jul. 1981	Annually	23.10°N	72.63°E	690	0.8	NA	Somayajulu et al., 1984
Trivandrum, India	Jul. 1979 - Aug. 1980	Annually	8.50°N	76.95°E	1620	1.4	NA	Somayajulu et al., 1984
Paris, France	Apr. 1978 - Apr. 1979	Monthly	48.80°N	2.35°E	NA	1.73448	NA	Raisbeck et al., 1979
Kikai Island, Japan	Jun. 2000 - Jun. 2002	Sub-annually	28.29°N	130.00°E	2120	2.8	NA	Maejima et al., 2005
NEEM, Greenland	1980 - 2000	Sub-annually	77.45°N	51.06°W	218.2	0.197	Polar region, considering little dust influence	Zheng et al., 2018
EGRIP, Greenland	1980 - 2000	Annually	75.62°N	35.98°W	129.1	0.15		Zheng et al., 2023
NGRIP, Greenland	1980 - 2000	Annually	75.17°N	42.50°W	190	0.23		Berggren et al., 2009
Das2, Greenland	1980 - 2000	Annually	67.52°N	36.05°W	905	0.49		Pedro et al., 2012
Renland, Greenland	1980 - 1988	Annually	71.30°N	26.72°W	520	0.45		Aldahan et al., 1998
GRIP, Greenland	1986 - 1991	Sub-annually	77.45°N	51.06°W	240	0.278		Heikkila et al., 2008
DSS, Antarctica	1980 - 2000	Annually	66.77°S	112.81°E	750	0.34		Pedro et al., 2012
Vostok, Antarctica	1980 - 2000	Annually	78.00°S	106.00°E	23	0.17756		Baroni et al., 2011
Dome C, Antarctica	1985 - 2000	Annually	74.65°S	124.17°E	32	0.1744		Baroni et al., 2011
DML, Antarctica	1980 - 1988	Annually	73.60°S	12.43°W	240	0.3		Aldahan et al., 1998
Dome C, Antarctica	Multiply years (surface firn)	NA	75.10°S	123.30°E	25	0.1415		Auer et al., 2009
Neumayer, Antarctica	Multiply years (surface firn)	NA	70.65°S	8.25°W	360	0.4482		Auer et al., 2009
Kohnen, Antarctica	Multiply years (surface firn)	NA	75.00°S	0.07°E	64	0.19328		Auer et al., 2009

## Sheet: Table S4
		Table S4. 7Be and 10Be production rates averaged over the troposphere, stratosphere, stratosphere+troposphere in the production models of LP67, P16, and P16spa (g/day). See text for details.
				7Be				10Be
				LP67	P16 (for 1958)	P16 (for 2012)	P16spa (for 2012)	LP67	P16 (for 1958)	P16 (for 2012)	P16spa (for 2012)
		Global	Troposphere	0.146	0.09	0.117	0.116	0.104	0.064	0.083	0.083
			Stratosphere	0.272	0.15	0.235	0.233	0.216	0.089	0.139	0.138
			Stratosphere + Troposphere	0.402	0.24	0.352	0.349	0.32	0.154	0.222	0.221
		Northern Hemisphere	Stratosphere + Troposphere	0.201429	0.12	0.176	0.165	0.16	0.077	0.111	0.105
		Southern Hemisphere	Stratosphere + Troposphere	0.201429	0.12	0.176	0.184	0.16	0.077	0.111	0.116
